# Supplementary material for: A genomic biomarker-based model for cancer risk stratification of non-dysplastic Barrett’s esophagus patients after extended follow up; results from Dutch surveillance cohorts
Source: PubMed Central journal article supplement (PMC7153893; doi:10.1371/journal.pone.0231419), 2020-04-13
Supplement: pone.0231419.s001.pdf [file pone.0231419.s001.pdf]

| Model                                       | Median<br>iAUC <sup>^</sup><br>1000<br>rep | Median<br>AIC <sup>^</sup><br>1000 rep | P value<br>wald* | P value<br>likelihood<br>ratio* | HR*           | 95% CI*              |
|---------------------------------------------|--------------------------------------------|----------------------------------------|------------------|---------------------------------|---------------|----------------------|
| 1 marker:<br>Shannon CDKN2A                 | 0.55                                       | 148                                    | 0.3              | 0.3                             | 0.28          | 0.03-2.76            |
| 2 markers:<br>Simpson C CDKN2A/ ERBB2       | 0.55                                       | 148                                    | 0.4              | 0.4                             | 0.25          | 0.01-7.68            |
| <b>3 markers:<br/>NC TP53/ERBB2/CEP17</b>   | <b>0.56</b>                                | <b>147</b>                             | <b>0.03</b>      | <b>0.07</b>                     | <b>821491</b> | <b>3.44-1.96e+11</b> |
| 4 markers:<br>NC<br>CDKN2A/TP53/ERBB2/CEP17 | 0.53                                       | 149                                    | 0.2              | 0.3                             | 883.3         | 0.03-28046568        |

†markers CDKN2A/TP53/ERBB2/ CEP17

<sup>^</sup> Obtained with bootstrapping

\* Results from univariate Cox proportional hazards models. Bold values indicate statistical significance (P<0.05).

iAUC, integrated Area Under the Curve; AIC, Akaike's Information Criterion; HR, Hazard Ratio; CI,

Confidence Interval; Shannon, Shannon diversity score; Simpson C, Simpson Compliment diversity score; NC,

Normalized Clone score
