# Supplementary material for: A genomic biomarker-based model for cancer risk stratification of non-dysplastic Barrett’s esophagus patients after extended follow up; results from Dutch surveillance cohorts
Source: PubMed Central journal article supplement (PMC7153893; doi:10.1371/journal.pone.0231419), 2020-04-13
Supplement: pone.0231419.s002.pdf [file pone.0231419.s002.pdf]

| Model                                     | Median<br>iAUC <sup>^</sup><br>1000 rep | Median<br>AIC <sup>^</sup><br>1000 rep | P value<br>wald* | P value<br>likelihood<br>ratio* | HR*   | 95% CI*    |
|-------------------------------------------|-----------------------------------------|----------------------------------------|------------------|---------------------------------|-------|------------|
| 1 marker:<br>NC CEP7                      | 0.59                                    | 152                                    | 0.7              | 0.7                             | 6.93  | 0.00-65306 |
| 2 markers:<br>NC CEP7/20q                 | 0.63                                    | 151                                    | 0.4              | 0.5                             | 19.87 | 0.01-26655 |
| 3 markers:<br>NC CEP7/20q/c-MYC           | 0.62                                    | 149                                    | 0.2              | 0.3                             | 57.59 | 0.20-16823 |
| 4 markers:<br>NC CEP7/CEP17/<br>20q/c-MYC | 0.61                                    | 150                                    | 0.1              | 0.2                             | 66.79 | 0.30-15024 |

†markers CEP7/CEP17/20q/c-MYC

<sup>^</sup> Obtained with bootstrapping

\* Results from univariate Cox proportional hazards models.

iAUC, integrated Area Under the Curve; AIC, Akaike's Information Criterion; HR, Hazard Ratio; CI,

Confidence Interval; NC, Normalized Clone score
