# Supplementary material for: A genomic biomarker-based model for cancer risk stratification of non-dysplastic Barrett’s esophagus patients after extended follow up; results from Dutch surveillance cohorts
Source: PubMed Central journal article supplement (PMC7153893; doi:10.1371/journal.pone.0231419), 2020-04-13
Supplement: pone.0231419.s003.pdf [file pone.0231419.s003.pdf]

| Variable                                              | Variable type                   | Mean | P value* | HR*       | 95% CI*                 |
|-------------------------------------------------------|---------------------------------|------|----------|-----------|-------------------------|
| Age (df=4)1                                           | 0-25%<br>(19-<br>51.25 years)   |      | 0.18     | 1.75e+12  | 2.77e-06<br>- 1.10e+30  |
| Age (df=4)2                                           | 25-50%<br>(51.25-<br>60 years)  |      | 0.13     | 2.36e+08  | 3.19e-03<br>- 1.74e+19  |
| Age (df=4)3                                           | 50-75%<br>(60-<br>67 years)     |      | 0.18     | 4.77e+24  | 9.87e-12<br>- 2.30e+60  |
| Age (df=4)4                                           | 75-100%<br>(67-<br>87 years)    |      | 0.28     | 2.12e+04  | 3.44e-04<br>- 1.30e+12  |
| C-Barrett length                                      | continuous                      | 2.72 | 0.03     | 1.12      | 1.01<br>- 1.25          |
| Normalized clones<br>CEP7/CEP17/20q/c-MYC<br>(df=6) 1 | 0-16.7%<br>(0.01<br>-<br>0.013) |      | 0.46     | 0.32      | 1.47e-02<br>- 6.86      |
| Normalized clones<br>CEP7/CEP17/20q/c-MYC<br>(df=6) 2 | 16.7-33%<br>(0.013-0.020<br>)   |      | 0.04     | 20        | 1.24<br>- 322           |
| Normalized clones<br>Cep7/Cep17/20q/c-MYC<br>(df=6) 3 | 33-50%<br>(0.020-<br>0.027)     |      | 0.94     | 0.89      | 4.74e-02<br>- 16.7      |
| Normalized clones<br>CEP7/CEP17/20q/c-MYC<br>(df=6) 4 | 50-66.7%<br>(0.027-0.033)       |      | 0.01     | 1.19e+12  | 1.62e+03<br>- 8.77e+20  |
| Normalized clones<br>CEP7/CEP17/20q/c-MYC<br>(df=6) 5 | 66.7-83.3%<br>(0.033-0.050)     |      | 0.09     | 1.83e-70  | 3.74e-151<br>- 8.95e+10 |
| Normalized clones<br>Cep7/Cep17/20q/c-MYC<br>(df=6) 6 | 83.3-100%<br>(0.050-0.5<br>)    |      | 0.07     | 3.79e-153 | 9.45e-320<br>- 1.52e+14 |

\* Results from multivariate Cox proportional hazards model.

HR, Hazard Ratio; CI, Confidence Interval; df, degrees of freedom

Splines were used to divide the variables age and diversity in multiple segments (segment boundaries are described in column “variable type”).
